# Supplementary material for: In Silico Modeling of Liver Metabolism in a Human Disease Reveals a Key Enzyme for Histidine and Histamine Homeostasis
Source: PubMed Central journal article supplement (PMC4906368; doi:10.1016/j.celrep.2016.05.014), 2016-05-26
Supplement: mmc6.pdf [file mmc6.pdf]

# Cell Reports

## In Silico Modeling of Liver Metabolism in a Human Disease Reveals a Key Enzyme for Histidine and Histamine Homeostasis

### Graphical Abstract

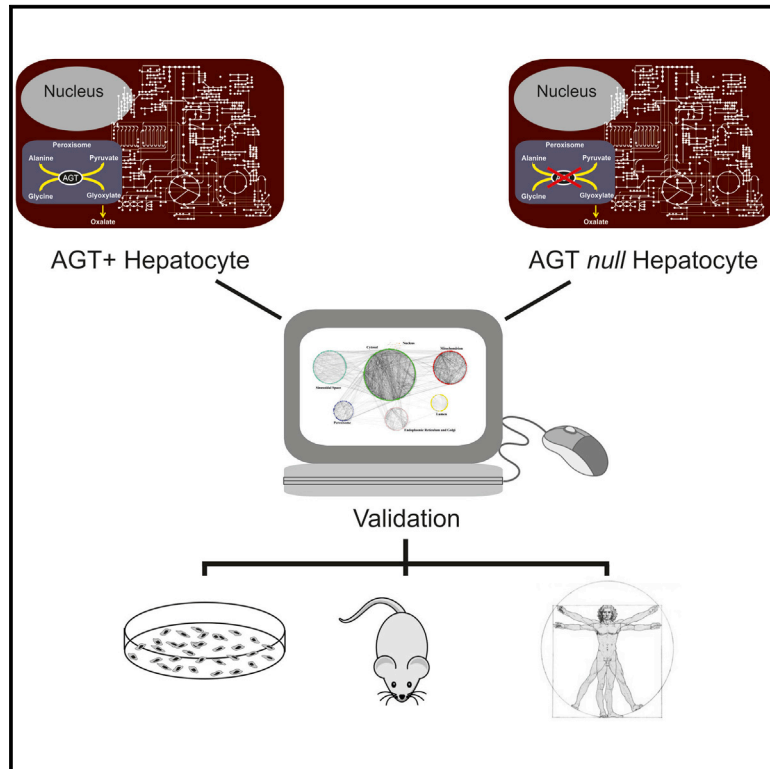

### Authors

Roberto Pagliarini, Raffaele Castello, Francesco Napolitano, ..., Mario De Marchi, Nicola Brunetti-Pierri, Diego di Bernardo

### Correspondence

brunetti@tigem.it (N.B.-P.),  
dibernardo@tigem.it (D.d.B.)

### In Brief

Pagliarini et al. use a computational model of liver metabolism to predict alterations caused by the loss of alanine:glyoxylate aminotransferase (AGT), resulting in primary hyperoxaluria type I (PH1). In addition to known disease biomarkers, the model predicts a reduction in histidine and histamine levels. GPT overexpression in PH1 mice normalizes histamine and oxalate levels.

### Highlights

- In silico model of liver metabolism reveals global metabolic alterations in PH1
- Changes in amino acid metabolism in PH1 result in a reduction of histidine and histamine
- GPT overexpression normalizes histamine levels and reduces oxalate in PH1 mice

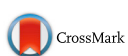

# In Silico Modeling of Liver Metabolism in a Human Disease Reveals a Key Enzyme for Histidine and Histamine Homeostasis

Roberto Pagliarini,<sup>1,6</sup> Raffaele Castello,<sup>1,6</sup> Francesco Napolitano,<sup>1</sup> Roberta Borzone,<sup>1</sup> Patrizia Annunziata,<sup>1</sup> Giorgia Mandrile,<sup>2,3</sup> Mario De Marchi,<sup>2,3</sup> Nicola Brunetti-Pierri,<sup>1,4,\*</sup> and Diego di Bernardo<sup>1,5,\*</sup>

<sup>1</sup>Telethon Institute of Genetics and Medicine, 80078 Pozzuoli, Italy

<sup>2</sup>Medical Genetics, San Luigi University Hospital, 10043 Orbassano, Italy

<sup>3</sup>Department of Clinical & Biological Sciences, University of Turin, 10043 Orbassano, Italy

<sup>4</sup>Department of Translational Medicine, Federico II University, 80131 Naples, Italy

<sup>5</sup>Department of Chemical, Materials and Industrial Engineering, Federico II University, 80125 Naples, Italy

<sup>6</sup>Co-first author

\*Correspondence: [brunetti@tigem.it](mailto:brunetti@tigem.it) (N.B.-P.), [dibernardo@tigem.it](mailto:dibernardo@tigem.it) (D.d.B.)

<http://dx.doi.org/10.1016/j.celrep.2016.05.014>

## SUMMARY

Primary hyperoxaluria type I (PH1) is an autosomal-recessive inborn error of liver metabolism caused by alanine:glyoxylate aminotransferase (AGT) deficiency. In silico modeling of liver metabolism in PH1 recapitulated accumulation of known biomarkers as well as alteration of histidine and histamine levels, which we confirmed in vitro, in vivo, and in PH1 patients. AGT-deficient mice showed decreased vascular permeability, a readout of in vivo histamine activity. Histamine reduction is most likely caused by increased catabolism of the histamine precursor histidine, triggered by rerouting of alanine flux from AGT to the glutamic-pyruvate transaminase (GPT, also known as the alanine-transaminase ALT). Alanine administration reduces histamine levels in wild-type mice, while overexpression of GPT in PH1 mice increases plasma histidine, normalizes histamine levels, restores vascular permeability, and decreases urinary oxalate levels. Our work demonstrates that genome-scale metabolic models are clinically relevant and can link genotype to phenotype in metabolic disorders.

## INTRODUCTION

Metabolism is primarily or secondarily affected in several acquired and inherited human diseases. Characterization of the metabolic changes occurring in health and disease states has a wide range of implications, from elucidation of pathogenetic mechanisms to development of new biomarkers and drug discovery.

Inborn errors of metabolism (IEMs) are a group of Mendelian disorders resulting from genetic disruption of single metabolic enzymes. A large number of these reactions occurs in the liver.

The study of these disorders has been instrumental to understanding the physiological consequences of metabolic reactions and pathogenesis of more common multifactorial diseases. In contrast to Mendelian diseases, which are due to severe impairment of single-enzyme reactions, common multifactorial diseases may result from mild impairment of several metabolic reactions (Lanpher et al., 2006). Nevertheless, our understanding of the consequences of single-enzyme deficiencies on metabolism as a whole are underappreciated, since most studies have been narrowly focused on the affected metabolic reactions, thus neglecting alterations of more distant metabolites. In most patients affected with IEMs, there are few therapeutic options that are often limited to common sense interventions aimed at either reducing the substrate or increasing the product of the affected reaction.

Tissue-specific genome-scale metabolic models, which have only recently become available through the efforts of the modeling community, allow in silico prediction of the effects of genetic or chemical perturbations on human metabolism (Gille et al., 2010; Jerby et al., 2010; Shlomi et al., 2009; Thiele et al., 2013). These computational models have been used to predict, for example, cancer drug targets (Folger et al., 2011), anti-aging drugs (Yizhak et al., 2014), and biomarkers for rare metabolic disorders (Duarte et al., 2007; Shlomi et al., 2009; Thiele et al., 2013).

Here we applied a computational approach to predict and analyze the metabolic alterations occurring in hepatocytes lacking alanine:glyoxylate aminotransferase (AGT), a peroxisomal enzyme encoded by the *AGXT* gene and mutated in primary hyperoxaluria type 1 (PH1).

PH1 is an autosomal recessive disease that presents with hyperoxaluria, progressive renal involvement, and systemic deposition of calcium oxalate in multiple organs and tissues. Although the enzyme is only expressed in hepatocytes, lack of AGT results in excessive production of oxalate by the liver, leading to oxalate-induced damage in several tissues, particularly in kidneys. PH1 is a severe disease that results in high morbidity, pain, disability, poor quality of life, and early death if treated late or

left untreated. Effective treatments for PH1 are still lacking and combined liver-kidney transplantation is the only available therapeutic option for patients with severe forms (Hoppe et al., 2009).

PH1 was chosen for our computational metabolic modeling for the following reasons: (1) the defective enzyme is expressed only in the liver, (2) enzyme deficiency does not result in structural changes of the liver that could secondarily affect metabolic functions, and (3) a mouse model is available to readily investigate alterations predicted by the computational approach (Salido et al., 2006). We demonstrated *in vitro*, *in vivo*, and in the sera of PH1 patients that current genome-scale metabolic models are now sufficiently detailed to enable *in silico* prediction of the pathophysiological consequences of a single-enzyme deficiency and to suggest therapeutic targets. We correctly identified metabolites known to accumulate in PH1, such as glyoxylate, glycolate, and oxalate, but also discovered a link between AGT and the metabolism of histidine and histamine. Moreover, we proved that such models can be used to identify and validate potential therapeutic enzyme targets for PH1.

## RESULTS

### Computational Approach to Predict Metabolic Alterations Due to Single-Enzyme Defect in Hepatocytes

We applied a computational systems-level approach to simulate *in silico* metabolic alterations in hepatocytes due to the gain of function (GoF) or loss of function (LoF) of a single enzyme starting from a recently published genome-scale metabolic network model of human hepatocytes (HepatoNet1). The *in silico* model comprises 777 metabolites and 2,539 reactions across eight compartments (Gille et al., 2010).

We first extended HepatoNet1 by including 50 additional enzymatic and transport reactions and eight metabolites (Table S1) related to glyoxylate metabolism that were needed to model PH1, including the reaction carried out by AGT. One of the reactions we added is the *cytosolic* alanine-glyoxylate transamination carried out by the glutamic-pyruvate transaminase (GPT), also known as alanine aminotransferase (ALT) (Donini et al., 2009). Hence, in the extended model, GPT catalyzes in the cytoplasm the same reaction as AGT in the peroxisome, in addition to its canonical function (glutamate-pyruvate or alanine-transaminase), already present in the original model.

We next applied an algorithm we recently proposed, differential flux-balance analysis (DFA), to predict differences in metabolic fluxes and metabolite levels between wild-type (WT) and single-enzyme-defective hepatocytes across 442 different metabolic objectives (Table S2) (Pagliarini and di Bernardo, 2013). Of these, 123 simulate physiological hepatic functions (e.g., ATP production and amino acid degradation), while the remaining 319 are used for model validation (Gille et al., 2010).

DFA is based on flux balance analysis (FBA), a standard mathematical procedure to semiquantitatively estimate the metabolic flux of each metabolic reaction in a genome-scale model at steady state (i.e., no accumulation or depletion of metabolites) when satisfying a given metabolic objective (e.g., consume amino acids to produce glucose) (Orth et al., 2010). For each

metabolic objective, DFA computes the difference between the metabolic fluxes predicted by FBA in the WT genome-scale model versus the perturbed model (LoF or GoF of a single enzyme or of a set of them). The LoF model lacks the enzyme under investigation, whereas the GoF model is constrained so that the reaction(s) carried out by the enzyme of interest is forced to be more active than in the WT. The end result is a ranked list of metabolic fluxes of all the reactions in the model (2,589), sorted by their difference in the LoF (or GoF) model versus the WT model. This difference is computed as the average across the 442 metabolic objectives. Hence, the reactions that are most affected by the LoF (or GoF) will be found at the top of the ranked list. Once these differential metabolic fluxes have been identified, the metabolites (785) involved in the associated reactions are ranked to predict the most affected ones. This is done, for each metabolite, by summing the contribution of all the differential fluxes involving the same metabolite. This value is then used for the ranking, so that the metabolites whose fluxes are most affected by the LoF (or GoF) will be found at the top of the ranked list. Finally, we applied a modified version (Experimental Procedures) of flux variability analysis (FVA) (Duarte et al., 2007; Shlomi et al., 2009; Thiele et al., 2013) to the top-ranked metabolites to estimate whether these tend to increase or decrease in the LoF (or GoF) model compared to the WT model.

### In Silico Model of PH1

We applied DFA and FVA on the extended HepatoNet1 model to simulate the effect of AGT enzyme LoF, causative of PH1. We thus obtained a ranked list of 590 metabolites (Table 1; Table S3), obtained from the list of 785 metabolites after removing small molecules, co-factors, and pooled metabolites in Table S2, and a list of 2,589 reactions (Table S3) ranked according to their predicted change following AGT LoF. We observed that hundreds of reactions, which are not directly related to peroxisomal AGT, are perturbed throughout the metabolic network and across multiple cellular organelles (Table S3). Interestingly, the AGT-like glyoxylate detoxification reactions carried out by AGXT2 in mitochondria and GPT in the cytoplasm increased their flux following AGXT LoF (Table S3; Figure S1). However, these compensatory effects were not sufficient to normalize oxalate levels (Table 1; Table S3), in agreement with disease development in affected patients.

The significance of model predications was assessed by metabolite set enrichment analysis (MSEA) (Xia and Wishart, 2010). MSEA is a statistical procedure for metabolomic studies that takes as input a list of altered metabolites in a patient and automatically predicts the most likely metabolic disorder. This is done by checking whether the metabolites in input are statistically enriched for known biomarkers of the disease. The top 50 metabolites predicted to change the most by the *in silico* model of PH1 (Table S3) were used to run MSEA. MSEA ranked PH1 as the most likely disease of 346 diseases (Table S3,  $p$  value = 0.00117).

The metabolites predicted to change the most by the *in silico* analysis (i.e., ranked in the top 50 positions, Table S3) included all the three major urine and plasma biomarkers of PH1 patients (Table 1; Table S3), i.e., the disease-causing oxalate, glycolate, and glyoxylate (Danpure, 2006). In addition to the known disease

**Table 1. The Top 20 Metabolites of 590 Whose Concentrations Are Predicted to Be Altered the Most by DFA as a Result of AGT LoF**

| Rank (Differential Flux Balance) | Metabolite Name              | KEGG ID           | Predicted Change (FVA) |
|----------------------------------|------------------------------|-------------------|------------------------|
| 1                                | serine                       | C00065            | –                      |
| 2                                | alanine                      | C00041            | =                      |
| 3                                | pyruvate/<br>hydroxypyruvate | C00022/<br>C00168 | –                      |
| 4                                | <i>glyoxylate</i>            | C00048            | +                      |
| 5                                | glycine                      | C00037            | +                      |
| 6                                | glycerate                    | C00258            | –                      |
| 7                                | <i>glycolate</i>             | C00160            | +                      |
| 8                                | glycolaldehyde               | C00266            | =                      |
| 9                                | glyceraldehyde               | C02154            | –                      |
| 10                               | hypoxanthine                 | C00262            | +                      |
| 11                               | xanthine                     | C00385            | =                      |
| 12                               | glutamate                    | C00217            | –                      |
| 13                               | oxaloacetate                 | C00036            | +                      |
| 14                               | glutathione                  | C00051            | =                      |
| 15                               | glutathione disulfide        | C00127            | =                      |
| 16                               | histidine                    | C00135            | =                      |
| 17                               | $\alpha$ -ketoglutarate      | C00026            | –                      |
| 18                               | histamine                    | C00388            | –                      |
| 19                               | thymine                      | C00178            | =                      |
| 20                               | dihydrothymine               | C00906            | =                      |

Metabolites are ranked by summing up the contribution of all differential fluxes involving each metabolite. The metabolites known to accumulate in the urine of PH1 patients (glyoxylate, glycolate, and oxalate) (Xia and Wishart, 2010) are shown in italic. Oxalate is ranked at position 39 of 590 (Table S3), hence it is not shown in this table. Column 4 reports the predicted sign of change in metabolite concentrations as computed by FVA (Supplemental Experimental Procedures): the metabolite concentration can be elevated (+), reduced (–), or (=) no sign could be predicted by FVA. Small molecules (e.g., water and carbon dioxide), co-factors (e.g., NADP and ATP), and a set of other metabolites were not considered because they are involved in a large number of reactions. The complete list of all metabolites and co-factors is reported in Table S2. Details on the analysis can be found in the Supplemental Experimental Procedures. See also Figure S1 and Tables S2 and S3, which contains the complete list.

biomarkers, several other metabolites listed in Table 1 were expected to change: pyruvate, alanine, and glycine are directly involved in the AGT reaction; hydroxypyruvate is oxidized to glycerate by glyoxalate reductase/hydroxypyruvate reductase (GRHPR), the enzyme deficient in primary hyperoxaluria type 2 (PH2) that catalyzes the reduction of glyoxylate to glycolate (Cramer et al., 1999); serine also was expected to change because of the serine-pyruvate transaminase activity of AGT (Danpure, 2006).

In contrast, other metabolites such as glutamate and  $\alpha$ -ketoglutarate (aKG) were unexpected, but the most surprising and interesting metabolites were histamine and its precursor histidine, whose levels were predicted to be altered in the AGT LoF model. Histamine is a biogenic amine with central roles in allergic responses and gastric acid secretion, involved in

regulation of immune response, inflammation-associated carcinogenesis, and neurotransmission. Histamine is endogenously generated from its precursor histidine by the histidine-decarboxylase in several tissues (Rosenthaler et al., 1965), including liver (Tran and Snyder, 1981), and this reaction was already present in HepatoNet1. So far, no relationship between histidine, or histamine, and AGT deficiency in PH1 has been reported.

### Histidine and Histamine Are Reduced in PH1

We measured liver and serum levels of aKG, histamine, and histidine in the *Agxt*<sup>−/−</sup> mouse model of PH1 that recapitulates the biochemical features of PH1 patients (Salido et al., 2006) to validate the in silico model, which predicted non-obvious changes in these three metabolites (Table 1). Consistent with the in silico result (Table 1), aKG was significantly reduced in *Agxt*<sup>−/−</sup> mouse serum (Figure S2A) compared to control mice.

Histamine levels in liver and serum were also significantly reduced in *Agxt*<sup>−/−</sup> mice compared to WT mice (Figures 1A and 1B). Histamine levels were increased compared to control uninjected *Agxt*<sup>−/−</sup> mice (Figures 1A and 1B) when hepatic AGT expression was restored in *Agxt*<sup>−/−</sup> mice by intravenous injection of a helper-dependent adenoviral vector encoding AGT under the control of a liver-specific promoter (HDAd-AGT) (Brunetti-Pierri and Ng, 2011; Brunetti-Pierri et al., 2005; Castello et al., 2016) (Figure S3A). Histamine levels were unaffected in *Agxt*<sup>−/−</sup> mice injected with HDAd-AFP, a vector expressing the unrelated reporter gene  $\alpha$ -fetoprotein under the control of the same expression cassette (serum histamine: 2.14  $\pm$  0.85 ng/ml; n = 5). In addition, compared to WT controls, *Agxt*<sup>−/−</sup> mice had decreased vascular permeability, a functional readout of histamine-mediated response, which was restored by liver-directed AGXT gene transfer (Figures 1C and 1D). Decreased histamine levels were also detected in AGXT knockdown human Huh-7 hepatic cells (Figure 1E; Figure S3B; Experimental Procedures) and in plasma of PH1 patients with confirmed AGXT mutations (Figure 1F; Table S3).

Histidine, the histamine precursor, was also significantly reduced in *Agxt*<sup>−/−</sup> mouse liver (Figure 1G) and serum (Figure 1H) compared to control mice, consistent with the in silico results (Table 1). However, histamine concentration in normal human plasma is in the nanomolar range, whereas histidine concentration is in the micromolar range. Therefore, it is not obvious that a reduction in histidine levels should result in systemic reduction of histamine levels. To address this issue, we performed intraperitoneal injections of histidine in both WT and *Agxt*<sup>−/−</sup> mice that resulted in increased serum histamine levels when compared to baseline levels (Figure 1I). This result confirms that changes in systemic histidine concentration can affect serum histamine levels in mice despite their great difference in plasma concentrations, as reported also in previous studies (Yoshikawa et al., 2014).

### AGT LoF Affects the Histidine Degradation Pathway

The in silico PH1 model revealed unexpected changes in histidine and histamine levels as a consequence of AGT LoF, which we confirmed both in vitro and in vivo.

The in silico analysis revealed a global perturbation of metabolism throughout the network, thus several different reactions

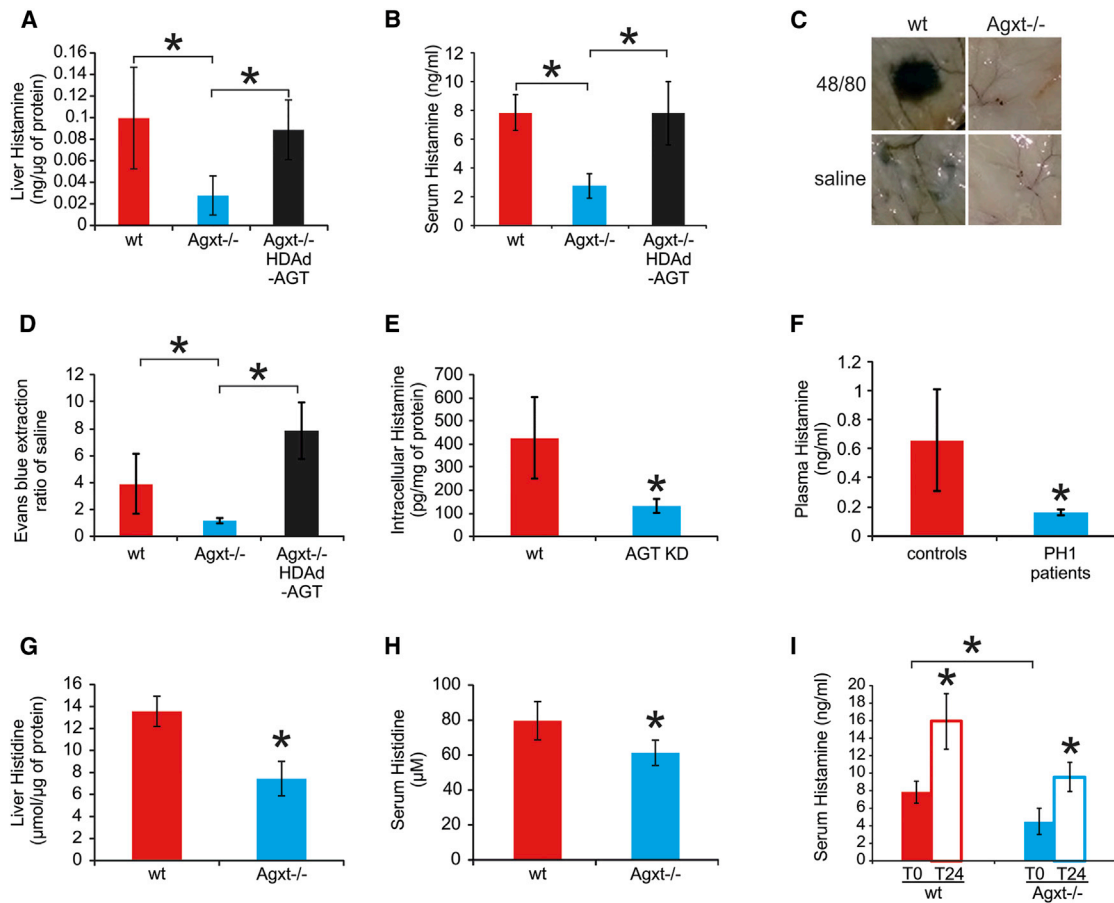

**Figure 1. Reduction of Histamine in PH1 Mice and Patients and in Cells Knocked Down for AGT**

(A and B) Histamine levels in livers (A) and sera (B) were reduced in Agxt<sup>-/-</sup> mice compared to wild-type (WT) mice (at least n = 3 per group). Agxt<sup>-/-</sup> mice with vector-mediated expression of AGT protein showed increased histamine in both livers (A) and serum (B).

(C) Compared to WT mice, Agxt<sup>-/-</sup> showed reduced Evans blue extravasation in turned-over skin after intravenous injection of Evans blue followed by intradermal injections of either saline or compound 48/80.

(D) The ratio of fluorescence units given by intradermal injection of 48/80 and normal saline was reduced in Agxt<sup>-/-</sup> mice (n = 8 per group).

(E) AGT-knockdown Huh-7 cells (AGT KD, Figure S3B) had reduced intracellular histamine compared to WT cells.

(F) Plasma histamine levels were reduced in PH1 patients harboring AGXT mutations (Table S2; n = 3) compared to normal subjects (n = 5).

(G and H) Histidine levels were reduced in livers (G) and sera (H) of Agxt<sup>-/-</sup> mice compared to WT.

(I) Intraperitoneal injections of histidine resulted in increased histamine levels at 24 hr after the injections (T24) compared to baseline levels (T0) in both Agxt<sup>-/-</sup> and control WT mice (n = 6 per group; \*p < 0.05).

See also Figures S1, S2, and S3.

might contribute to this effect. To better elucidate the most relevant pathways, we again applied MSEA to the metabolites most affected by AGT LoF in Table 1, but this time to investigate whether they were significantly enriched in known metabolic pathway(s) (rather than disease biomarkers) (Experimental Procedures). As shown in Table S3, the most significant pathways (p < 0.05) included amino acid metabolism (alanine, glycine, glutamate, and histidine), glutathione metabolism, ammonia recycling, and urea cycle. These last two pathways are involved in histidine degradation and glutamate metabolism. In addition, we noticed that aKG, alanine, pyruvate, and glutamate, all present in Table 1, are the metabolites involved in the alanine-transamination reaction (aKG + alanine → pyruvate + glutamate) carried out by GPT, the most abundant enzyme in liver, with a

central role in glutamate metabolism (Figure 2). Moreover, according to the in silico model, the GPT-mediated alanine-transamination reaction increases its flux following AGT LoF (Figure S1; Table S3; Supplemental Experimental Procedures).

We next asked why AGT LoF should affect the flux through GPT and in turn affect histidine metabolism. As shown in Figure 2 and Figure S1 and detailed in the Supplemental Experimental Procedures, according to the model, the fluxes through GPT increase because alanine is no longer consumed by AGT in the peroxisome and it is thus available to GPT in the cytoplasm (Figure 2; Figure S1; Table S3). Hence, both reactions carried out by GPT in the cytoplasm (the glyoxylate-transamination reaction and the alanine-transamination reaction producing pyruvate and glutamate) increase their flux (Table S3).



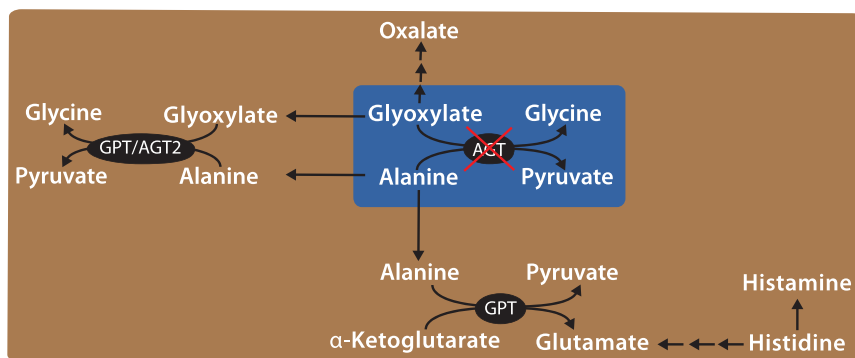

**Figure 2. The In Silico Metabolic Model Reveals a Link between AGT LoF and Histidine Metabolism Mediated by the Action of GPT**

Both AGT- and GPT-mediated reactions involve alanine, glyoxylate, glycine, and pyruvate. GPT catalyzes two different reactions in hepatocytes: the non-canonical glyoxylate detoxification reaction and the canonical reversible transamination between alanine and  $\alpha$ -ketoglutarate to generate pyruvate and glutamate. Glutamate is a key compound in amino acid degradation. Alteration of metabolic fluxes caused by AGT LoF are thus propagated via GPT to histidine metabolism. Histidine can be metabolized to glutamate and  $\alpha$ -ketoglutarate via a step of intermediary reactions (double arrows) and/or to histamine. The conversion of histidine into histamine also occurs in other cell types. See also [Figure S1](#) and [Tables S1, S2, S3, and S5](#).

The increase in the flux toward pyruvate and glutamate directly affects histidine metabolism because histidine can only be degraded to glutamate in the liver (or redirected to histamine but to a much lesser extent, because histamine is found in the nanomolar range whereas histidine is in the micromolar range). Specifically, according to the model, the increase in glutamate production results in increased flux through the urea cycle, allowing more histidine to be degraded to glutamate ([Table S3](#); [Supplemental Experimental Procedures](#)). These results are consistent with the experimental results ([Figure 1](#)).

However, since the in silico metabolic model does not include reactions involved in intracellular histamine degradation (e.g., histamine N-methyltransferase [HMT] catalyzing the conversion of histamine into N-methyl-histamine), we cannot rule out an additional contribution of these reactions to the observed phenotype. Therefore, we measured N-methyl-histamine in *Agxt*<sup>-/-</sup> mice, which was found to be increased compared to WT mice ([Figure S2B](#)).

To further probe the role of GPT in PH1, we also simulated GPT GoF in silico in the context of AGT LoF. As GPT carries out two reactions in the model (alanine transamination and glyoxylate transamination), we simulated an increase in the flux of both reactions. As reported in [Table S4](#), the model predicts a reduction of oxalate levels induced by GPT GoF and a decrease in the histidine degradation flux. Unsurprisingly, if we simulate an increase only in the flux through the alanine-transamination reaction, but not through the glyoxylate-transamination reaction, then no reductions in oxalate levels and in histidine degradation are predicted to occur ([Supplemental Experimental Procedures](#)).

In conclusion, as shown in [Figure 2](#), the reduction of histidine levels in PH1 is explained by an increase in the degradation of histidine in hepatocytes, mediated by GPT, and caused by an increased availability of alanine. The increased histidine degradation thus causes a decrease in histidine levels and hence in histamine levels.

### Alanine Reduces Histamine Levels in WT Mice while GPT Overexpression Restores Normal Histamine Levels and Reduces Urinary Oxalate in PH1 Mice

According to the in silico model, histidine/histamine reduction in AGT LoF occurs because alanine is redirected from AGT to GPT

and thus secondarily alters histidine metabolism ([Figure 2](#); [Figure S1](#)). If this is correct, then an excess of alanine in a WT context should cause a decrease of histamine levels systemically, whereas in PH1 mice there should be a weaker or no effect, as histamine is already reduced.

To validate this prediction, we investigated the effects of short-term alanine administration in mice. Intraperitoneal injection of alanine in WT mice resulted in decreased serum histamine levels at 2 hr compared to baseline levels, but no effects were detected in *Agxt*<sup>-/-</sup> mice ([Figure 3A](#); [Figure S2C](#)). The lack of response in *Agxt*<sup>-/-</sup> mice was expected, since in these mice histamine levels are already low, while the flux through GPT is increased because of the AGT LoF. The experimental validation of this non-obvious prediction of the model supports the simplified model in [Figure 2](#) linking glyoxylate detoxification to histidine metabolism.

To verify that GPT overexpression can restore normal histidine and histamine levels, as predicted in silico, at least when GPT can carry out also the *non-canonical* AGT-like reaction, we overexpressed GPT in *Agxt*<sup>-/-</sup> mice by an HDAd-Gpt vector encoding the murine GPT enzyme under the control of a liver-specific expression cassette ([Brunetti-Pierri and Ng, 2011](#); [Brunetti-Pierri et al., 2005](#)). *Gpt* gene transfer was confirmed by increased serum GPT levels ([Figure 3B](#)). Importantly, hepatic GPT overexpression increased serum histamine in PH1 mice ([Figure 3C](#)) to levels similar to those measured in WT mice ([Figure 1B](#)). Histidine, which was reduced in *Agxt*<sup>-/-</sup> mice, increased following GPT overexpression ([Figure 3D](#)). Moreover, GPT overexpression increased vascular permeability in *Agxt*<sup>-/-</sup> mice ([Figure 3E](#)). Finally, we also detected a decrease in urinary oxalate levels in HDAd-Gpt-injected *Agxt*<sup>-/-</sup> mice compared to uninjected *Agxt*<sup>-/-</sup> mice ([Figure 3F](#)), thus supporting GPT as a potential therapeutic target for PH1 therapy ([Donini et al., 2009](#)).

In conclusion, our in silico and experimental results support the simplified model of metabolism schematized in [Figure 2](#) and [Figure S1](#): the flux through the glutamate-pyruvate-transamination reaction carried out by GPT increases because alanine, which is no longer consumed by AGT, is redirected to GPT to produce pyruvate and glutamate. This perturbation in glutamate production has a direct effect on the flux through the histidine degradation pathway toward glutamate.

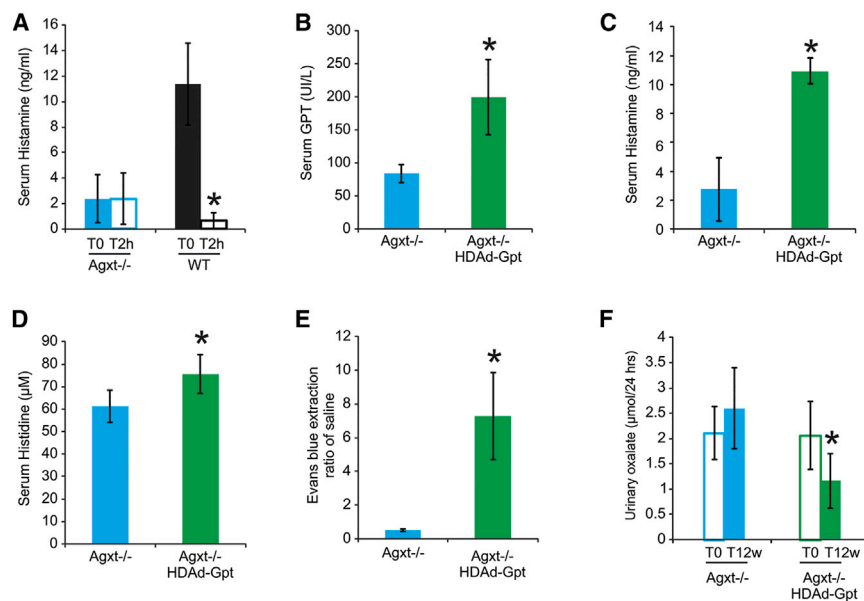

**Figure 3. Alanine Administration Reduces Histamine Levels in WT Mice, while GPT Hepatic Overexpression Increases Histamine Levels and Vascular Permeability and Reduces Urinary Oxalate in *Agxt*<sup>-/-</sup> Mice**

(A) Intraperitoneal injections of alanine reduced histamine levels at 2 hr after the injections (T2h) compared to baseline levels (T0) in WT mice (n = 5 per group).

(B) Intravenous injection of HDAd-Gpt vector expressing the mouse *Gpt* gene under the control of a liver-specific expression cassette (Brunetti-Pierri and Ng, 2011; Brunetti-Pierri et al., 2005) resulted in high serum concentration of GPT protein in *Agxt*<sup>-/-</sup> mice (n = 5 per group).

(C and D) Serum histamine (C) and histidine (D) levels were significantly increased in GPT-overexpressing mice.

(E) Vascular permeability measured as ratio of fluorescence units of Evans blue extracted from skin over saline after intradermal injection of 48/80 was increased in *Agxt*<sup>-/-</sup> mice injected with HDAd-Gpt compared to controls (n = 8 per group).

(F) Compared to baseline (T0) urinary oxalate was reduced at 12 weeks (T12w) post-injection in *Agxt*<sup>-/-</sup> mice injected with HDAd-Gpt (E). \*p < 0.05. See also Figures S1 and S2 and Table S4.

## DISCUSSION

Mammalian intermediary metabolism was defined several years ago in biochemical terms from *in vitro* studies, but we are still lacking a clear picture of *in vivo* metabolism as a whole. Metabolic reactions are interconnected in a complex biochemical network where LoF of a single enzyme may result in perturbations of multiple, distant metabolic pathways. However, understanding how alterations in one pathway affect other pathways, which may appear remote from the initial metabolic defect, remains elusive.

Here, we show that human genome-scale metabolic models, coupled to appropriate computational approaches, can be effectively used to model *in silico* a liver IEM and to obtain clinically relevant results.

We demonstrated that deficiency of AGT unexpectedly results in reduced histidine and histamine levels, presumably through an increase in histidine catabolism mediated by GPT and caused by a redirection of the alanine flux from AGT in the peroxisome toward GPT in the cytosol. In agreement with the model predictions, we demonstrated *in vivo* in WT mice that increasing systemic levels of histidine results in increased serum levels of histamine, whereas increasing systemic levels of alanine results in decreased serum histamine.

A limited number of mammalian cells, namely mast cells and other immune cells, gastric enterochromaffin-like cells, and histaminergic neurons, express histidine decarboxylase, which is involved in histamine production. In the liver, hepatocytes, biliary epithelial cells, oval cells, and dendritic cells can convert histidine to histamine (Chang et al., 2010). Using a hepatocyte-derived cell line, we were indeed able to detect reduced histamine following AGT knockdown.

Our study suggests that molecules blocking AGT might reduce histamine systemically by depleting systemic levels of

histidine, the substrate of histamine decarboxylase. Nevertheless, if developed, these antihistamine drugs should be used with caution because of potential oxalosis, which might occur because of severe and sustained reduction of AGT activity.

In addition, we demonstrated both *in silico* and *in vivo* that the increase in oxalate caused by AGT LoF is partly rescued by GPT overexpression. Hence, we confirmed GPT as a modifier gene or potential drug target for oxalate detoxification in patients with hyperoxalurias either primary or secondary. There have been great efforts to develop liver-directed gene therapy for IEMs (Piccolo and Brunetti-Pierri, 2015). Vectors encoding genes that are not functioning in disease state (i.e., AGXT in PH1) are obviously the first choice for gene therapy. Nevertheless, for PH1 patients harboring *null* mutations, who are at an increased risk for an immune reaction against the transgene product, gene therapy with the gene encoding for GPT would be an alternative option. Moreover, GPT expression can be combined within the gene therapy vector expressing AGT to further improve therapeutic efficacy.

Gene therapy with viral vectors has proven to be more difficult than initially anticipated, and immune system reactions against viral vectors and risks of insertional carcinogenesis remain important obstacles for clinical translation. Therefore, development of pharmacologic approaches based on small molecule drugs remains attractive. Toward this goal, the data generated in this study also could be exploited for therapy of PH1 by searching for human-approved drugs able to increase GPT expression. Besides applications for PH1 therapy, drugs reducing hyperoxaluria by GPT overexpression might be effective also for treatment of other forms of primary hyperoxalurias (e.g., PH2 and PH3) and more common forms of secondary hyperoxaluria (Xu et al., 2013). Our computational approach could be applied to identify additional drug-treatable targets to restore

physiological levels of metabolites, which are altered in Mendelian or even complex multifactorial disorders. Indeed, in the case of PH1, it would be possible to identify enzymes whose overexpression or knockdown results in reduced oxalate levels.

Our work has implications for PH1 patients as well as for patients affected by other metabolic diseases. Genome-scale metabolic models painstakingly built up from scratch by the modeling research community (Gille et al., 2010; Jerby et al., 2010; Thiele et al., 2013) might be applied to a large number of disorders, potentially leading to new knowledge on disease pathogenesis and to the identification of therapeutic targets.

In summary, our results show that a single-enzyme LoF results in dysregulation of several metabolic reactions, going beyond the classic view on the pathogenesis of a Mendelian disease, which is narrowly focused on the affected pathway in which the enzyme operates.

More than a century ago, Archibald Garrod proposed the concept of “chemical individuality,” suggesting that even healthy individuals are biochemically unique due to inherited differences in enzymes, which are reflected in a predisposition to multifactorial diseases (Childs, 1970). In a more contemporary perspective, this concept is reflected in individualized medicine and metabolomic profiling that can detect individuals at higher risks of developing specific diseases to develop targeted preventive or therapeutic interventions. As metabolic profiling based on tandem mass spectrometry (MS/MS) and nuclear magnetic resonance (NMR)-based technologies is becoming more widely used for diagnostics, the major challenges facing metabolomics are to determine whether abnormal metabolites are indeed involved in pathogenesis or can act as disease biomarkers correlating with disease severity. Computational approaches based on genome-scale metabolic models might assist in interpreting and validating large-scale metabolic alterations.

## EXPERIMENTAL PROCEDURES

### Extension and Analysis of the Genome-Scale Metabolic Model of Hepatocytes for PH1

The *in silico* metabolic network was described by a stoichiometric matrix (Pagliarini and di Bernardo, 2013) (Supplemental Experimental Procedures). A stoichiometric matrix contains information about all the metabolic transformations, and it is formed from the stoichiometric coefficients of each reaction that comprise the metabolic model, which commonly are integer numbers. Reactions and metabolites present in HepatoNet1 (Gille et al., 2010) network model were extended by including the following: (1) reactions and compounds known to be involved in glyoxylate metabolism, starting from published models (Duarte et al., 2007; Ma et al., 2007), public databases (Cerami et al., 2011; D'Eustachio, 2011; Kanehisa and Goto, 2000), and literature analysis (Cochat et al., 2012; Danpure, 1986; Donini et al., 2009); (2) transport reactions useful to balance the metabolic fluxes in the different compartments; and (3) metabolic routes, related to the amino acids that have been shown to be converted to oxalate, but which have not been completely defined yet (Asplin, 2002; Nguyen et al., 2001).

To validate the extended *in silico* model, we performed FBA to establish a flux distribution for each of the different metabolic objectives listed in Table S2. The principle of flux minimization (Holzhütter, 2004) was applied to optimize the metabolic objective and to compute an optimal metabolic flux, obtained as the solution of a constrained linear optimization problem. We also performed producibility analysis to check that the model was indeed able to produce all the compounds involved in glyoxylate metabolism. We

defined a metabolite  $x_i$  as producible if the network can sustain its synthesis under the steady-state and thermodynamic constraints. To test the producibility of  $x_i$ , we added a reaction in the cytoplasmic compartment consuming  $x_i$ , and then a flux-balance problem was solved to check if the *in silico* network was able to produce a strictly positive flux through this reaction. More details can be found in the Supplemental Experimental Procedures.

### Simulating Single-Enzyme LoF or GoF

To simulate the effect of an LoF of an enzyme  $e_j$  catalyzing the reaction  $r_j$ , we solved 442 optimization problems, corresponding to the 442 metabolic objectives and physiological functions reported in Table S2, by constraining the fluxes through  $r_j$  to zero. The same optimization problems were then solved for the WT model, but this time by constraining the fluxes through  $r_j$  to be larger than an activity threshold. The results of these simulations were stored in two matrices that contained the metabolic fluxes of each reaction across the different metabolic objectives, in the WT and LoF simulations, respectively (Supplemental Experimental Procedures).

To simulate a GoF of  $e_j$ , we followed a similar procedure, but this time constraining the fluxes through  $r_j$  to be greater at least ten times more than their value in the WT model (Supplemental Experimental Procedures).

### DFA and FVA

DFA is described in Pagliarini and di Bernardo (2013) and in the Supplemental Experimental Procedures. DFA aims at identifying the metabolites and reactions that are most affected by an enzyme LoF or GoF. Small molecules (e.g., water and carbon dioxide), cofactors (e.g., NADP and ATP), and a set of metabolites were not included, because they were involved in a large number of reactions (Table S2). DFA is based on computing FBA across 442 metabolic objectives for both the WT model and the perturbed model (i.e., with single-enzyme knockout or overexpression, or any combination of both). The average flux carried by each reaction across the 442 metabolic objectives for each of the two models is computed. For each reaction, we then take the difference of the average flux in the WT model minus its value in the modified model, expressed as a percentage of the WT flux. These differential fluxes are then used to rank the reactions from the ones that change the most in the modified model to the ones that change the least or do not change at all. Metabolites are then ranked according to the sum of the absolute values of the differential fluxes (Supplemental Experimental Procedures).

DFA allows us to compute the change in the concentration of a metabolite as result of an enzyme LoF or GoF, but not its sign. To establish if this concentration is expected to be elevated, reduced, or unchanged, we applied FVA (Duarte et al., 2007; Shlomi et al., 2009; Thiele et al., 2013). In FVA, an exchange interval for each metabolite is computed both in the WT model and in the LoF (GoF) model. This interval denotes the minimal flux and maximal flux of a metabolite that can be supported by the metabolic model. For each metabolite, FVA compares the exchange interval in WT model with the one in the LoF (GoF) model. If the two intervals overlap, then the metabolite is not affected by the enzyme LoF (GoF). Otherwise it is increased or decreased depending on the relative values of the two intervals (Supplemental Experimental Procedures). The code to run all of the simulations performed in this study can be found online (<http://dibernardo.tigem.it>).

### MSEA

MSEA is a bioinformatic tool to identify biologically meaningful patterns that are significantly enriched in metabolomic data and metabolic pathways (<http://www.metaboanalyst.ca/>) (Xia and Wishart, 2010). MSEA works by comparing the metabolites in a set to pre-defined functional groups. To identify the most likely diseases in Table S3, we used as input for the MSEA analysis the top 50 metabolites in Table S3 (Kyoto Encyclopedia of Genes and Genomes [KEGG] identifiers), and then we applied the over-representation analysis (ORA) of the MSEA online tool selecting the urine disease-associated metabolite sets option. To obtain the most significant pathways in Table S3, we used as input the top 20 metabolites in Table 1 and applied again the ORA, but this time selected the pathway-associated metabolite sets option. The list of pathways in Table S3 does not change significantly if we use the top 50 metabolites rather than the top 20.



### Mouse Procedures

*Agxt*<sup>-/-</sup> mice were described previously (Salido et al., 2006) and animal procedures were performed in accordance to the regulation of the Italian Ministry of Health. *Agxt*<sup>-/-</sup> mice were maintained on a SV-129 background. Injections of the HDAd vectors were performed in a volume of 200  $\mu$ l in the retro-orbital plexus of 3-month-old male mice. Blood samples were collected by retro-orbital bleeding. SV-129 background age- and sex-matched mice were used as controls.

Histamine-mediated skin permeability was determined through a gross staining using the compound 48/80 (Enzo Life Sciences) as described previously (Donelan et al., 2006).

3-month-old male *Agxt*<sup>-/-</sup> mice were injected intraperitoneally with L-Histidine (1 g/kg of body weight) and placed in metabolic cages for 24-hr urine collection. Blood samples for serum histamine levels were collected by retro-orbital bleeding 24 hr after histidine injections.

WT and *Agxt*<sup>-/-</sup> 3-month-old male mice were injected intraperitoneally with L-Alanine (1 g/kg of body weight). Blood samples for serum histamine levels were collected by retro-orbital bleeding 2 hr after the alanine injections.

### HDAd Vectors

HDAd-AGT, HDAd-GPT, and HDAd-AFP vectors all bear the PEPCK-WL expression cassette (Brunetti-Pierri et al., 2005, 2006), driving the expression of human *AGXT* or murine *Gpt*, respectively. HDAd was produced in 116 cells with the helper virus AdNG163 as described elsewhere (Pastore et al., 2013).

### Blood and Tissue Analyses

Histamine levels were determined in mouse serum and liver homogenates and in human plasma by ELISA (Labor Diagnostika Nord). For histamine determination on liver lysates, organs were homogenized in PBS using a Tissue Lyser (QIAGEN) and histamine levels were normalized for protein concentrations that were determined using Bradford Reagent (Bio-Rad).

Histamine in human plasma samples from PH1 patients and age-matched controls were analyzed by ELISA (IBL International). Methylhistamine was measured by ELISA (IBL International) on 24-hr urine collection according to the manufacturer's protocol. Amino acids were measured by high-performance liquid chromatography (HPLC) at the Biochemical Laboratories at Baylor College of Medicine.

For western blotting, liver specimens were homogenized in radio-immunoprecipitation assay (RIPA) buffer and complete protease inhibitor cocktail (Sigma), incubated for 20 min at 4°C and centrifuged at 13,200 rpm for 10 min. Pellets were discarded and cell lysates were used for western blots. Proteins were loaded on a 12% SDS-PAGE, and, after transfer to a polyvinylidene fluoride (PVDF) membrane, blots were blocked with TBS-Tween-20 containing 5% non-fat milk for 1 hr at room temperature, followed by incubation with primary antibody overnight at 4°C. The primary antibodies used were a rabbit anti-human AGT (Sigma) and rabbit anti-calnexin (Enzo Life Sciences).

### Human Huh-7 Hepatic Cell Line

Huh-7 cells were cultured at 37°C with 5% CO<sub>2</sub> in DMEM supplemented with 10% v/v fetal bovine serum and penicillin/streptomycin. Cells were transfected with a plasmid containing a small hairpin RNA (shRNA) for *AGXT* gene (OriGene) using TransIT-LT1 transfection reagent according to the manufacturer's instructions (Mirus). Selection of transfected clones was performed starting at 24 hr after transfection with 1  $\mu$ g/ml puromycin, and single stably transformed cell line clones were isolated. Downregulation of AGT was shown by western blotting with primary rabbit polyclonal anti-AGT (Sigma) and primary monoclonal anti-calnexin antibody (Enzo Life Sciences). Horseradish peroxidase (HRP)-conjugated antibodies were used as secondary antibody (GE Healthcare).

### Statistical Analyses

Experimental data are presented as mean  $\pm$  SD. Statistical significance was computed using the Student's two-sided t test and p values < 0.05 were considered significant.

### SUPPLEMENTAL INFORMATION

Supplemental Information includes Supplemental Experimental Procedures, three figures, and five tables and can be found with this article online at <http://dx.doi.org/10.1016/j.celrep.2016.05.014>.

### AUTHOR CONTRIBUTIONS

R.P., N.B.-P., and D.d.B. conceived the idea. R.P. designed the computational approach and performed simulations. F.N. helped with software coding, debugging, and testing. R.C. and N.B.-P. conceived and designed the experiments. R.C. performed the experiments. G.M. and M.D.M. provided human PH1 samples. R.B. generated the AGT-deficient cell line. P.A. generated the HDAd vectors. R.P., N.B.-P., and D.d.B. wrote the manuscript.

### ACKNOWLEDGMENTS

The authors wish to thank L. O'Mahony for helpful comments; A. Ballabio, G. Marone, and G. Diez-Roux for critical review of the manuscript; and the TIGEM/IGB animal facility staff for the help with the animal procedures. This work was supported by grants of the Italian Telethon Foundation (TGM11SB1 to D.d.B. and TGM11MT3 to N.B.-P.), the European Research Council (IEMTx to N.B.-P.), the Hyperoxaluria and Oxalosis Foundation (to N.B.-P.), and the Italian PON (PONa3\_00311 to R.C.).

Received: April 23, 2015

Revised: March 29, 2016

Accepted: April 28, 2016

Published: May 26, 2016

### REFERENCES

- Asplin, J.R. (2002). Hyperoxaluric calcium nephrolithiasis. *Endocrinol. Metab. Clin. North Am.* 31, 927–949.
- Brunetti-Pierri, N., and Ng, P. (2011). Helper-dependent adenoviral vectors for liver-directed gene therapy. *Hum. Mol. Genet.* 20 (R1), R7–R13.
- Brunetti-Pierri, N., Palmer, D.J., Mane, V., Finegold, M., Beaudet, A.L., and Ng, P. (2005). Increased hepatic transduction with reduced systemic dissemination and proinflammatory cytokines following hydrodynamic injection of helper-dependent adenoviral vectors. *Mol. Ther.* 12, 99–106.
- Brunetti-Pierri, N., Ng, T., Iannitti, D.A., Palmer, D.J., Beaudet, A.L., Finegold, M.J., Carey, K.D., Cioffi, W.G., and Ng, P. (2006). Improved hepatic transduction, reduced systemic vector dissemination, and long-term transgene expression by delivering helper-dependent adenoviral vectors into the surgically isolated liver of nonhuman primates. *Hum. Gene Ther.* 17, 391–404.
- Castello, R., Borzone, R., D'Aria, S., Annunziata, P., Piccolo, P., and Brunetti-Pierri, N. (2016). Helper-dependent adenoviral vectors for liver-directed gene therapy of primary hyperoxaluria type 1. *Gene Ther.* 23, 129–134.
- Cerami, E.G., Gross, B.E., Demir, E., Rodchenkov, I., Babur, O., Anwar, N., Schultz, N., Bader, G.D., and Sander, C. (2011). Pathway Commons, a web resource for biological pathway data. *Nucleic Acids Res.* 39, D685–D690.
- Chang, C.F., Fan, J.Y., Zhang, F.C., Ma, J., and Xu, C.S. (2010). Transcriptome atlas of eight liver cell types uncovers effects of histidine catabolites on rat liver regeneration. *J. Genet.* 89, 425–436.
- Childs, B. (1970). Sir Archibald Garrod's conception of chemical individuality: a modern appreciation. *N. Engl. J. Med.* 282, 71–77.
- Cochat, P., Hulton, S.A., Acquaviva, C., Danpure, C.J., Daudon, M., De Marchi, M., Fargue, S., Groothoff, J., Harambat, J., Hoppe, B., et al.; OxalEurope (2012). Primary hyperoxaluria Type 1: indications for screening and guidance for diagnosis and treatment. *Nephrol. Dial. Transplant.* 27, 1729–1736.
- Cramer, S.D., Ferree, P.M., Lin, K., Milliner, D.S., and Holmes, R.P. (1999). The gene encoding hydroxypyruvate reductase (GRHPR) is mutated in patients with primary hyperoxaluria type II. *Hum. Mol. Genet.* 8, 2063–2069.
- D'Eustachio, P. (2011). Reactome knowledgebase of human biological pathways and processes. *Methods Mol. Biol.* 694, 49–61.

- Danpure, C.J. (1986). Peroxisomal alanine:glyoxylate aminotransferase and prenatal diagnosis of primary hyperoxaluria type 1. *Lancet* 2, 1168.
- Danpure, C.J. (2006). Primary hyperoxaluria type 1: AGT mistargeting highlights the fundamental differences between the peroxisomal and mitochondrial protein import pathways. *Biochim. Biophys. Acta* 1763, 1776–1784.
- Donelan, J., Boucher, W., Papadopoulou, N., Lytinas, M., Papaliodis, D., Dobner, P., and Theoharides, T.C. (2006). Corticotropin-releasing hormone induces skin vascular permeability through a neurotensin-dependent process. *Proc. Natl. Acad. Sci. USA* 103, 7759–7764.
- Donini, S., Ferrari, M., Fedeli, C., Faini, M., Lamberto, I., Marletta, A.S., Mellini, L., Panini, M., Percudani, R., Pollegioni, L., et al. (2009). Recombinant production of eight human cytosolic aminotransferases and assessment of their potential involvement in glyoxylate metabolism. *Biochem. J.* 422, 265–272.
- Duarte, N.C., Becker, S.A., Jamshidi, N., Thiele, I., Mo, M.L., Vo, T.D., Srivas, R., and Palsson, B.O. (2007). Global reconstruction of the human metabolic network based on genomic and bibliomic data. *Proc. Natl. Acad. Sci. USA* 104, 1777–1782.
- Folger, O., Jerby, L., Frezza, C., Gottlieb, E., Ruppin, E., and Shlomi, T. (2011). Predicting selective drug targets in cancer through metabolic networks. *Mol. Syst. Biol.* 7, 501.
- Gille, C., Bölling, C., Hoppe, A., Bulik, S., Hoffmann, S., Hübner, K., Karlstädt, A., Ganeshan, R., König, M., Rother, K., et al. (2010). HepatoNet1: a comprehensive metabolic reconstruction of the human hepatocyte for the analysis of liver physiology. *Mol. Syst. Biol.* 6, 411.
- Holzhütter, H.G. (2004). The principle of flux minimization and its application to estimate stationary fluxes in metabolic networks. *Eur. J. Biochem.* 271, 2905–2922.
- Hoppe, B., Beck, B.B., and Milliner, D.S. (2009). The primary hyperoxalurias. *Kidney Int.* 75, 1264–1271.
- Jerby, L., Shlomi, T., and Ruppin, E. (2010). Computational reconstruction of tissue-specific metabolic models: application to human liver metabolism. *Mol. Syst. Biol.* 6, 401.
- Kanehisa, M., and Goto, S. (2000). KEGG: kyoto encyclopedia of genes and genomes. *Nucleic Acids Res.* 28, 27–30.
- Lanpher, B., Brunetti-Pierri, N., and Lee, B. (2006). Inborn errors of metabolism: the flux from Mendelian to complex diseases. *Nat. Rev. Genet.* 7, 449–460.
- Ma, H., Sorokin, A., Mazein, A., Selkov, A., Selkov, E., Demin, O., and Goryainov, I. (2007). The Edinburgh human metabolic network reconstruction and its functional analysis. *Mol. Syst. Biol.* 3, 135.
- Nguyen, Q.V., Kälin, A., Drouve, U., Casez, J.P., and Jaeger, P. (2001). Sensitivity to meat protein intake and hyperoxaluria in idiopathic calcium stone formers. *Kidney Int.* 59, 2273–2281.
- Orth, J.D., Thiele, I., and Palsson, B.O. (2010). What is flux balance analysis? *Nat. Biotechnol.* 28, 245–248.
- Pagliarini, R., and di Bernardo, D. (2013). A genome-scale modeling approach to study inborn errors of liver metabolism: toward an in silico patient. *J. Comput. Biol.* 20, 383–397.
- Pastore, N., Blomenkamp, K., Annunziata, F., Piccolo, P., Mithbaakar, P., Maria Sepe, R., Vetrini, F., Palmer, D., Ng, P., Polishchuk, E., et al. (2013). Gene transfer of master autophagy regulator TFEB results in clearance of toxic protein and correction of hepatic disease in alpha-1-anti-trypsin deficiency. *EMBO Mol. Med.* 5, 397–412.
- Piccolo, P., and Brunetti-Pierri, N. (2015). Gene therapy for inherited diseases of liver metabolism. *Hum. Gene Ther.* 26, 186–192.
- Rosenthaler, J., Guirard, B.M., Chang, G.W., and Snell, E.E. (1965). Purification and properties of histidine decarboxylase from *Lactobacillus* 30a. *Proc. Natl. Acad. Sci. USA* 54, 152–158.
- Salido, E.C., Li, X.M., Lu, Y., Wang, X., Santana, A., Roy-Chowdhury, N., Torres, A., Shapiro, L.J., and Roy-Chowdhury, J. (2006). Alanine-glyoxylate aminotransferase-deficient mice, a model for primary hyperoxaluria that responds to adenoviral gene transfer. *Proc. Natl. Acad. Sci. USA* 103, 18249–18254.
- Shlomi, T., Cabili, M.N., and Ruppin, E. (2009). Predicting metabolic biomarkers of human inborn errors of metabolism. *Mol. Syst. Biol.* 5, 263.
- Thiele, I., Swainston, N., Fleming, R.M., Hoppe, A., Sahoo, S., Aurich, M.K., Haraldsdottir, H., Mo, M.L., Rolfsson, O., Stobbe, M.D., et al. (2013). A community-driven global reconstruction of human metabolism. *Nat. Biotechnol.* 31, 419–425.
- Tran, V.T., and Snyder, S.H. (1981). Histidine decarboxylase. Purification from fetal rat liver, immunologic properties, and histochemical localization in brain and stomach. *J. Biol. Chem.* 256, 680–686.
- Xia, J., and Wishart, D.S. (2010). MSEA: a web-based tool to identify biologically meaningful patterns in quantitative metabolomic data. *Nucleic Acids Res.* 38, W71–W77.
- Xu, H., Zisman, A.L., Coe, F.L., and Worcester, E.M. (2013). Kidney stones: an update on current pharmacological management and future directions. *Expert Opin. Pharmacother.* 14, 435–447.
- Yizhak, K., Le Devedec, S.E., Rogkoti, V.M., Baenke, F., de Boer, V.C., Frezza, C., Schulze, A., van de Water, B., and Ruppin, E. (2014). A computational study of the Warburg effect identifies metabolic targets inhibiting cancer migration. *Mol. Syst. Biol.* 10, 744.
- Yoshikawa, T., Nakamura, T., Shibakusa, T., Sugita, M., Naganuma, F., Iida, T., Miura, Y., Mohsen, A., Harada, R., and Yanai, K. (2014). Insufficient intake of L-histidine reduces brain histamine and causes anxiety-like behaviors in male mice. *J. Nutr.* 144, 1637–1641.

**Cell Reports, Volume 15**

**Supplemental Information**

**In Silico Modeling of Liver Metabolism  
in a Human Disease Reveals a Key Enzyme  
for Histidine and Histamine Homeostasis**

**Roberto Pagliarini, Raffaele Castello, Francesco Napolitano, Roberta Borzone, Patrizia Annunziata, Giorgia Mandrile, Mario De Marchi, Nicola Brunetti-Pierri, and Diego di Bernardo**

Supplemental Information:  
In silico modelling of liver metabolism in a  
human disease reveals a key enzyme  
for histidine and histamine homeostasis

Roberto Pagliarini<sup>1,\*</sup>, Raffaelel Castello<sup>1,\*</sup>,  
Francesco Napolitano<sup>1</sup>, Roberta Borzone<sup>1</sup>, Patrizia Annunziata<sup>1</sup>,  
Giorgia Mandrile<sup>2,3</sup>, Mario De Marchi<sup>2,3</sup>  
Nicola Brunetti-Pierri<sup>1,4,&</sup> and Diego di Bernardo<sup>1,5,&</sup>

<sup>1</sup>Telethon Institute of Genetics and Medicine  
80078 Pozzuoli (Naples), Italy

<sup>2</sup>Medical Genetics, San Luigi University Hospital  
10043 Orbassano (Turin), Italy

<sup>3</sup>Department of Clinical & Biological Sciences  
University of Turin, 10043 Orbassano (Turin), Italy

<sup>4</sup>Department of Translational Medicine  
Federico II University, 80125 Naples, Italy

<sup>5</sup>Department of Chemical, Materials and Industrial Engineering  
Federico II University, Naples, Italy

\*equal contributors; & corresponding authors



# 1 Supplemental Figures

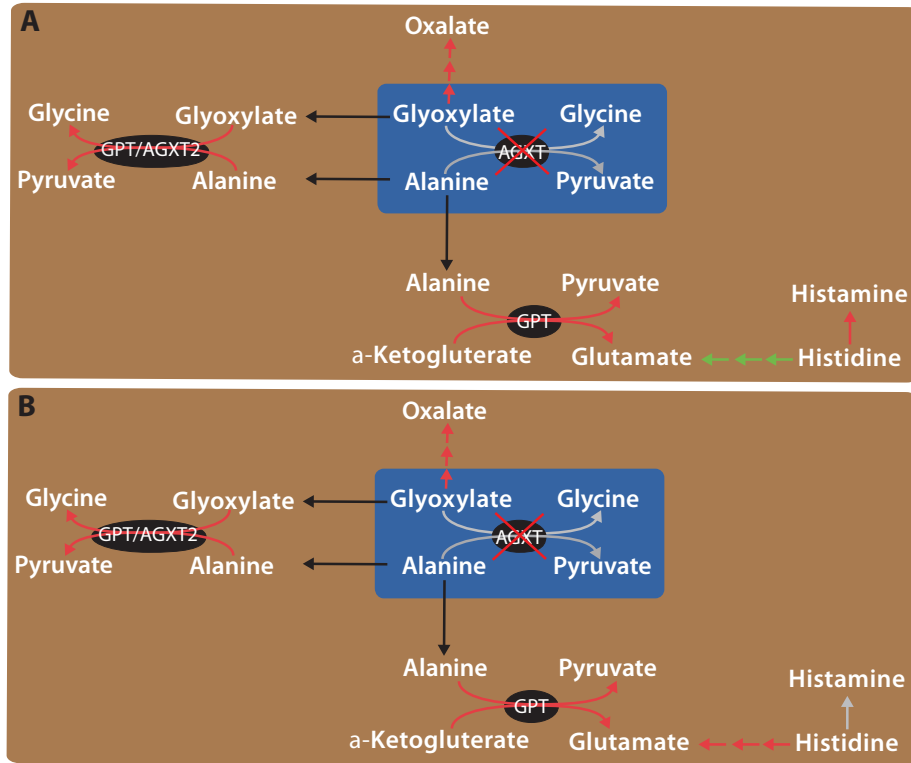

**Figure S 1: The link between AGXT Loss-of-Function and the histidine degradation pathway according to the *in silico* metabolic model. Related to Figures 1, 2, and 3 and Table 1.** Dashed lines represent pathways, while black ones represent transport reactions. Grey lines indicate Loss-of-Function (LoF), while green/red ones indicate a reduction/increase in the average metabolic flux across the 442 simulated metabolic objectives in each of the following conditions: (A) AGXT LoF versus Wild-Type: the metabolic fluxes through GPT and AGXT2 are increased, while the histidine degradation pathway towards glutamate is decreased. (B) AGXT LoF versus Wild-Type when forcing the flux of histidine to histamine reaction to be zero: the metabolic fluxes through GPT and AGXT2 are increased, but differently to (A), the histidine degradation pathway towards glutamate is increased.

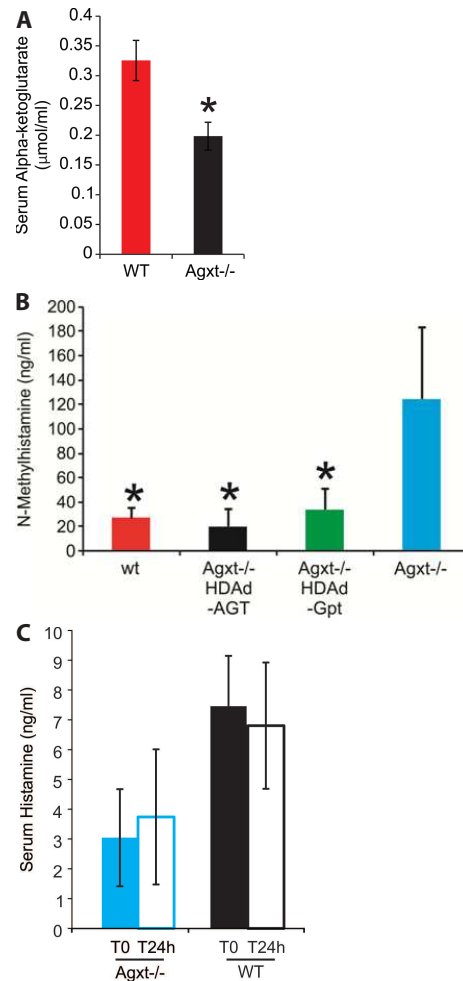

**Figure S 2: Metabolic alterations in PH1 mice. Related to Figures 1 and 3.** (A)  $\alpha$ -ketoglutarate reduction in Agxt<sup>-/-</sup> mice serum compared to control mice. \* $p < 0.05$ . (B) N-methyl-histamine resulting from histamine degradation via histamine N-methyltransferase (HMT) was increased in Agxt<sup>-/-</sup> mice compared to wild-type (wt) mice and was normalized by the injections of either HDAd-AGT or HDAd-GPT. \* $p < 0.05$ . (C) Short-term alanine administration has no effect on histamine levels 24hrs after administration. Intraperitoneal injections of alanine did not reduce histamine levels at 24 hours after the injections (T24h) compared to baseline levels (T0) in WT mice and PH1 mice (n=5 per group). On the contrary it strongly reduced histamine levels in WT mice at 2h after the injection as shown in **Figure 3A** of the main text. Indeed, alanine should be completely normalised in mice at 24hrs after the injection due to the high demand for alanine caused by the glucose-alanine cycle involving liver and muscles.

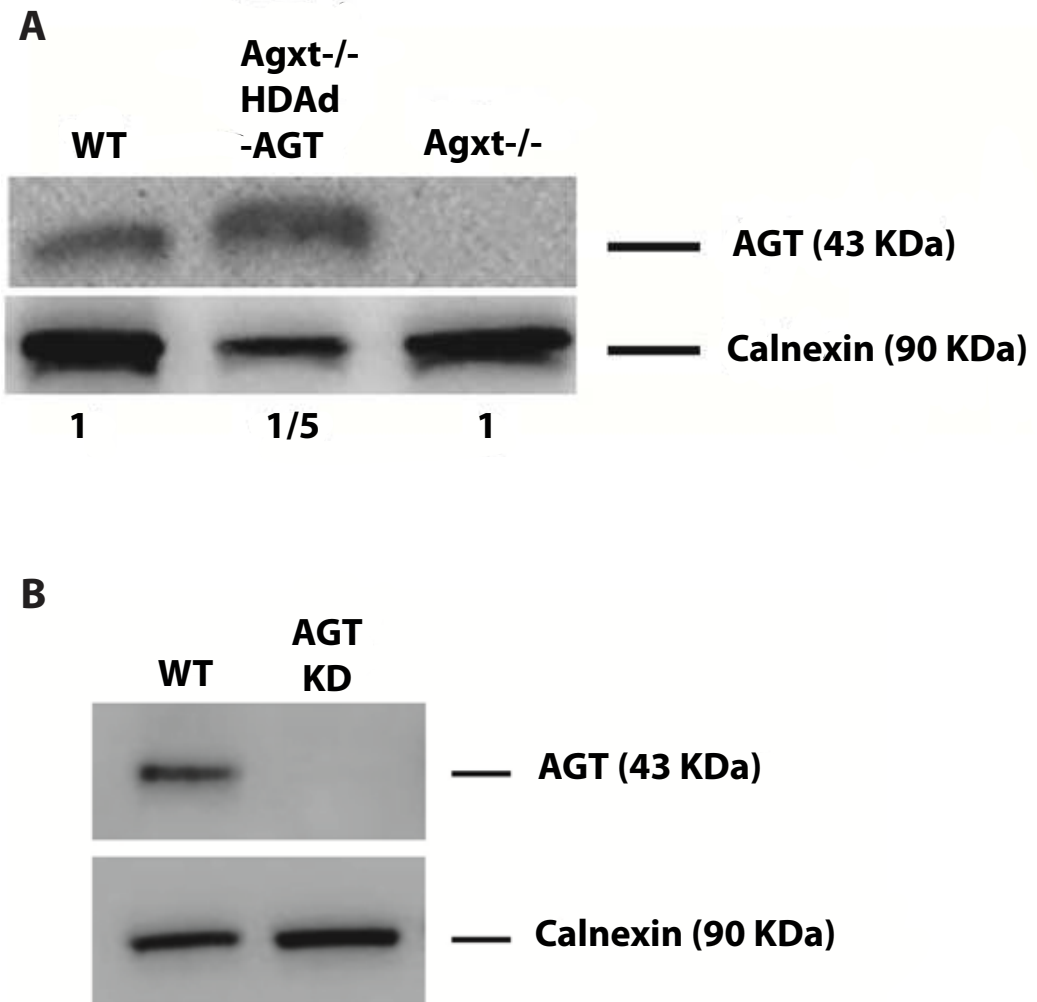

**Figure S 3: AGT protein levels in PH1 mice and Huh-7 cells. Related to Figure 1.** (A) Western blot of livers of  $Agxt^{-/-}$  mice showed undetectable AGT protein that was increased after intravenous injection of HDAd-AGT vector expressing the human AGXT gene (protein amount loaded on gel was 1/5 in HDAd-AGT injected mice). (B) Western blot for AGT in AGT knock-down Huh-7 cells showed undetectable AGT protein levels.

## 2 Supplemental Tables

| Peroxisomal reactions                                                                                                                              | Ref.      |
|----------------------------------------------------------------------------------------------------------------------------------------------------|-----------|
| <b>Alanine(p)</b> + <b>Glyoxylate(p)</b> → <b>Glycine(p)</b> + Pyruvate(p)                                                                         | [1, 3, 4] |
| <b>Serine(p)</b> + Pyruvate(p) → <b>Hydroxypyruvate(p)</b> + <b>Alanine(p)</b>                                                                     | [3]       |
| <b>Glyoxylate(p)</b> + O <sub>2</sub> (p) → H <sub>2</sub> O <sub>2</sub> (p) + <b>Oxalate(p)</b>                                                  | [1, 3]    |
| <b>Glycolate(p)</b> + O <sub>2</sub> (p) → <b>Glyoxylate(p)</b> + H <sub>2</sub> O <sub>2</sub> (p)                                                | [3, 6]    |
| <b>Glycine(p)</b> + H <sub>2</sub> O(p) + O <sub>2</sub> (p) → <b>Glyoxylate(p)</b> + H <sub>2</sub> O <sub>2</sub> (p) + <b>NH<sub>3</sub>(p)</b> | [3, 4]    |
| Chenodeoxycholoyl-CoA(p) + <b>Glycine(p)</b> → CoA(p) + <b>Glycochenodeoxycholate(p)</b>                                                           | [8]       |
| Choloyl-CoA(p) + <b>Glycine(p)</b> → CoA(p) + <b>Glycocholate(p)</b>                                                                               | [8]       |
| H <sub>2</sub> O(p) + O <sub>2</sub> (p) + <b>Sarcosine(p)</b> → Formaldehyde(p) + <b>Glycine(p)</b> + H <sub>2</sub> O <sub>2</sub> (p)           | [8]       |
| H <sub>2</sub> O <sub>2</sub> (p) ⇌ O <sub>2</sub> (p) + H <sub>2</sub> O(p)                                                                       | [3]       |
| <b>Serine(p)</b> + <b>Glyoxylate(p)</b> → <b>Hydroxypyruvate(p)</b> + <b>Glycine(p)</b>                                                            | [3]       |
| Cytoplasmic reactions                                                                                                                              | Ref.      |
| H <sub>2</sub> O <sub>2</sub> (c) ⇌ O <sub>2</sub> (c) + H <sub>2</sub> O(c)                                                                       | [3]       |
| <b>Glyoxylate(c)</b> + NAD <sup>+</sup> (c) → NADH(c) + Oxalate(c)                                                                                 | [3, 4]    |
| <b>Glyoxylate(c)</b> + NADPH(c) → <b>Glycolate(c)</b> + NADP <sup>+</sup> (c)                                                                      | [1, 3]    |
| <b>Glyoxylate(c)</b> + NADH(c) → <b>Glycolate(c)</b> + NAD <sup>+</sup> (c)                                                                        | [3]       |
| <b>3htmelys(c)</b> + H+(PG)(c) → <b>4tmeabut(c)</b> + Glycine(c)                                                                                   | [8]       |
| <b>Gcald(c)</b> + H <sub>2</sub> O(c) + NAD <sup>+</sup> (c) → <b>Glycolate(c)</b> + 2 H+(PG)(c) + NADH(c)                                         | [8]       |
| <b>Glyoxylate(c)</b> + Alanine(c) → Glycine(c) + Pyruvate(c)                                                                                       | [7]       |
| Serine(c) ⇌ Glycine(c) + H <sub>2</sub> O(c)                                                                                                       | [3]       |
| <b>Glycolaldehyde(c)</b> + NAD <sup>+</sup> (c) → <b>Glycolate(c)</b> + NADH(c)                                                                    | [3]       |
| Hydroxypyruvate(c) → <b>Glycolaldehyde(c)</b> + CO <sub>2</sub> (c)                                                                                | [3]       |
| Hydroxypyruvate(c) + NADH(c) → Glycerate(c) + NAD <sup>+</sup> (c)                                                                                 | [1, 3]    |
| Mitochondrial reactions                                                                                                                            | Ref.      |
| Alanine(m) + <b>Glyoxylate(m)</b> → Glycine(m) + Pyruvate(m)                                                                                       | [2, 4]    |
| <b>Glyoxylate(m)</b> + H+(PG)(m) + NADPH(m) → <b>Glycolate(m)</b> + NADP <sup>+</sup> (m)                                                          | [2]       |
| Glycine(m) + H+(PG)(m) + Lipoamide(m) ⇌ <b>Alpam(m)</b> + CO <sub>2</sub> (m)                                                                      | [8]       |
| Glycine(m) + H+(PG)(m) + <b>Lpro(m)</b> ⇌ <b>ALpro(m)</b> + CO <sub>2</sub> (m)                                                                    | [8]       |
| FAD(m) + <b>Sarcosine(m)</b> + THF(m) → FADH <sub>2</sub> (m) + Glycine(m) + 5,10-Methylene-THF(m)                                                 | [8]       |
| Transport reactions                                                                                                                                | Ref.      |
| H <sub>2</sub> O <sub>2</sub> (c) ⇌ H <sub>2</sub> O <sub>2</sub> (p)                                                                              | [*]       |
| <b>NH<sub>3</sub>(p)</b> ⇌ NH <sub>3</sub> (c)                                                                                                     | [*]       |
| H+(PG)(p) ⇌ H+(PG)(c)                                                                                                                              | [*]       |
| Alanine(c) ⇌ <b>Alanine(p)</b>                                                                                                                     | [*]       |
| Pyruvate(p) ⇌ Pyruvate(c)                                                                                                                          | [*]       |
| <b>Serine(p)</b> ⇌ Serine(c)                                                                                                                       | [*]       |
| <b>Glycochenodeoxycholate(p)</b> ⇌ Glycochenodeoxycholate(c)                                                                                       | [*]       |
| <b>Glycocholate(p)</b> ⇌ Glycocholate(c)                                                                                                           | [*]       |
| <b>Sarcosine(p)</b> ⇌ Sarcosine(c)                                                                                                                 | [*]       |
| Formaldehyde(p) ⇌ Formaldehyde(c)                                                                                                                  | [*]       |
| <b>NH<sub>4</sub><sup>+</sup>(p)</b> ⇌ NH <sub>4</sub> <sup>+</sup> (c)                                                                            | [*]       |
| Glycine(c) ⇌ <b>Glycine(p)</b>                                                                                                                     | [2, 6]    |
| Glycine(c) ⇌ Glycine(m)                                                                                                                            | [2, 6]    |
| <b>Glycolate(c)</b> ⇌ <b>Glycolate(p)</b>                                                                                                          | [1, 4-6]  |
| <b>Glycolate(c)</b> ⇌ <b>Glycolate(m)</b>                                                                                                          | [*]       |
| <b>Glyoxylate(c)</b> ⇌ <b>Glyoxylate(m)</b>                                                                                                        | [4]       |
| <b>Glyoxylate(c)</b> ⇌ <b>Glyoxylate(p)</b>                                                                                                        | [1, 4, 5] |
| <b>Oxalate(p)</b> ⇌ Oxalate(c)                                                                                                                     | [5]       |
| <b>Hydroxypyruvate(p)</b> ⇌ Hydroxypyruvate(c)                                                                                                     | [12]      |
| Consuming reactions                                                                                                                                | Ref.      |
| Glycerate(c) →                                                                                                                                     | [5]       |
| Oxalate(c) →                                                                                                                                       | [4]       |
| <b>Glycolate(c)</b> →                                                                                                                              | [4]       |
| <b>Glycolaldehyde(c)</b> →                                                                                                                         | [5]       |
| Histamine(s) →                                                                                                                                     | [*]       |

**Table S 1: The set of enzymatic, transport and consuming reactions that extends the genome-scale model developed in [9]. Related to Figure 2.** (c), (m), (p) represent metabolite compartment abbreviations: (c): cytosol; (m): mitochondrial matrix; (p): peroxisome. 3htmelys: 3-Hydroxy-N<sub>6</sub>,N<sub>6</sub>,N<sub>6</sub>-trimethyl-L-lysine, 4tmeabut: 4-Trimethylammoniobutanal, Alpam: S-aminomethylidihydrolipoamide, Alpro: S-Aminomethylidihydrolipoylprotein, Lpro: Lipoylprotein. The metabolite in bold font have been introduced in order to extend HepatoNet1. Ref. = references.



**Table S 2** can be found in **Supplemental File 1. The 442 metabolic objectives used for the *in silico* simulations, together with the compounds, small metabolites and co-factor excluded from the *in silico* analysis and the demographics and AGXT mutations of PH1 patients. Related to Table 1 and Figure 2.** (Sheet1): the 442 metabolic objectives used for the *in silico* simulations. The metabolic objectives were adapted to our formulation of the linear optimisation problem (Subsection 3.1). Column 1: the unique name for the simulation, as in [9]; column 2: the target reactions; column 3: boundary reactions. MIMES, MIPES, PIPES, MES, DES, HES, WES define different sets of metabolites that can be taken up or released by the *in silico* network model. Further details about these sets can be found in [9]. (Sheet2): Compounds, small metabolites and co-factor excluded from the *in silico* analysis. (Sheet3): demographics and AGXT mutations of PH1 patients. \*= this patient received kidney transplantation at 28 years.

**Table S 3** can be found in **Supplemental File 2. Metabolites and reactions whose concentrations are affected by the AGT LoF according to *in silico* analysis and Metabolic Set Enrichment Analysis (MSEA). Related to Table 1 and Figure 2.** (Sheet1): reactions ranked according to DFA analysis. Reactions are ranked according to predicted mean absolute change of the flux in the 442 objective functions. Column 1: reactions; column 2: enzymes and transporters; column 3: the average flux value across the 442 metabolic objective according to DFA; column 4: the absolute value of column 3 used to rank the reactions; columns 5 and 6 indicate the reactions direction in WT and PH1 conditions, respectively. In particular, if 0 the reaction is not active, if 1 the reaction direction goes from left to right, and if  $-1$  the reaction direction goes from right to left. (Sheet2): compounds ranked considering model compartments. Metabolites are ranked according to the predicted absolute change, as computed by DFA using Eq. (7). (Sheet3): compounds ranked as in sheet 2 without considering and removing small molecules and cofactors listed in **Table S2**. (Sheet4): results from Metabolite Set Enrichment Analysis (diseases). Only diseases for which the MSEA p-value  $< 0.05$  are reported. The top 50 metabolites predicted to change the most by the *in silico* model of PH1 (**Table S3**, Sheet3) have were used to run the analysis. Column Total indicates the number of metabolites in the set, while the column Hits reports the number of set compounds in the input list. (Sheet5): results from Metabolite Set Enrichment Analysis (pathways). Only pathways for which MSEA p-value  $< 0.05$  are reported. The top 20 metabolites predicted to change the most by the *in silico* model of PH1 (**Table 1**) were used to run the analysis. Column Total indicates the number of metabolites in the set while, the column Hits reports the number of that compounds in the input list.

**Table S 4** can be found in **Supplemental File 3. Metabolites and reactions whose concentrations are affected by simulated GPT GoF *in silico* in the context of AGT LoF. Related to Figure 3 and Experimental Procedure.** (Sheet1): reactions ranked according to DFA analysis. Reactions are ranked according to predicted mean absolute change of flux in the 442 objective functions. In particular, Column 1: reactions; column 2: enzymes and transporters associated with each reaction; column 3: the average value of flux across the 442 metabolic objective according to DFA; column 4: the absolute value of column 3 (the value used to rank the reactions); columns 5 and 6: reactions direction in WT and PH1 conditions, respectively. In particular, if 0 the reaction is not active, if 1 the reaction direction goes from left to right, and if  $-1$  the reaction direction goes from right to left. (Sheet2): compounds ranked considering model compartments. Metabolites are ranked according to the predicted absolute change, as computed by DFA using Eq. (7). (Sheet3): compounds ranked as in sheet 2 without considering and removing small molecules and cofactors listed in **Table S2**.

**Table S 5** can be found in **Supplemental File 4. Metabolites and reactions whose concentrations are affected by the AGT LoF according to *in silico* and forcing the flux of histidine to histamine to be zero. Related to Figure 2 and Experimental Procedure.** (Sheet1): reactions ranked according to DFA analysis. Reactions are ranked according to predicted mean absolute change of the flux in the 442 objective functions. Column 1: reactions; column 2: enzymes and transporters; column 3: the average flux value across the 442 metabolic objective according to DFA; column 4: the absolute value of column 3 used to rank the reactions; columns 5 and 6 indicate the reactions direction in WT and PH1 conditions, respectively. In particular, if 0 the reaction is not active, if 1 the reaction direction goes from left to right, and if  $-1$  the reaction direction goes from right to left. (Sheet2): compounds ranked considering model compartments. Metabolites are ranked according to the predicted absolute change, as computed by DFA using Eq. (7). (Sheet3): compounds ranked as in sheet 2 without considering and removing small molecules and cofactors listed in **Table S2**.

### 3 Supplemental Experimental Procedures

#### 3.1 Constraint-based modelling of primary hyperoxaluria type I

The hepatocyte-specific metabolic network is described by a stoichiometric matrix  $\mathbb{S} \in \mathbb{R}^{n \times 2m}$ , where  $n$  is the number of metabolites and  $m$  the number of reactions. We considered  $2m$  reactions because a metabolic flux can be, in principle, positive or negative depending on its direction (forward or reverse). To deal with non-negative variables, each reaction was thus represented by two irreversible ones (the forward and the backward reaction) [10].

The Flux Balance Analysis (FBA) problem can be stated as the solution for the vector variable  $V$  of the following equation:

$$\mathbb{S} \times V = 0 \quad (1)$$

where

$$V = (v_1^{(+)}, v_2^{(+)}, \dots, v_m^{(+)}, v_1^{(-)}, v_2^{(-)}, \dots, v_m^{(-)}) \in \mathbb{R}^{2m}$$

is the vector of fluxes associated with the forward and reverse reactions of the network.

Since in Eq. (1) usually  $n < 2m$  the solution is not unique, hence a set of physiological meaningful constraints is added to the possible values that the metabolic fluxes  $V$  can achieve. Moreover, it is necessary to define input and output metabolites, i.e. the set of boundary reactions ( $\mathcal{R}_{bound}$ ) specifying which metabolites are provided to the network (inputs) and which ones have to be produced (outputs). These boundary reactions are needed to obtain physiological meaningful solutions. For a physiological function with  $k$  boundary reactions, we can rewrite Eq. (1) as an extended stoichiometric matrix  $\tilde{\mathbb{S}} \in \mathbb{R}^{n \times (2m+k)}$  and an extended vector of fluxes  $\tilde{V} \in \mathbb{R}^{2m+k}$ . Finally, in order to simulate a specific physiological function (i.e. breakdown of an amino acid to produce glucose) a set of target reactions ( $\mathcal{R}_{tar}$ ) with a fixed flux value has to be specified.

The FBA problem can thus be formally stated as the solution to the following linear optimisation problem [10]:

$$\min_{V \in \mathbb{R}^{2m}} \left( \sum_{j=1}^m (w_j \times v_j^{(+)} + w_j \times K_j^{equ} \times v_j^{(-)}) \right) \quad (2)$$

subject to the following constraints:

$$\begin{aligned} \tilde{\mathbb{S}} \times \tilde{V} &= 0 \\ l_j^{(+)} \leq v_j^{(+)} \leq u_j^{(+)} &\text{ if } r_j \notin \mathcal{R}_{tar} \\ l_j^{(-)} \leq v_j^{(-)} \leq u_j^{(-)} &\text{ if } r_j \notin \mathcal{R}_{tar} \\ v_j &= k_j \text{ if } r_j \in \mathcal{R}_{tar} \end{aligned} \quad (3)$$

where  $u_j^{(+)}, u_j^{(-)} \in \mathbb{R}^+$  represent the upper bounds of  $v_j^{(+)}$  and  $v_j^{(-)}$ , respectively, and  $l_j^{(+)} = l_j^{(-)}$  the lower bounds (we set  $l_j^{(+)} = l_j^{(-)} = 0$  in our simulations);  $w_j$  is the weight associated with the flux  $v_j$ ; the equilibrium constants  $K_j^{equ}$  have been

introduced to constraint fluxes according to Gibbs free energy calculations as listed in supplementary data of [9]. Weighting the backward flux with the thermodynamic equilibrium constants takes into account the thermodynamic effort connected with reversing the natural direction of the reaction [10].

Specifically, we expressed the equilibrium constant for a reaction  $r_j$  through the change of Gibbs free energy under the standard conditions, denoted as  $\Delta G_{r_j}^0$ , by applying the following rule:

$$K_j^{equ} = e^{-\frac{\Delta G_{r_j}^0}{R \cdot T}} \quad (4)$$

where  $R$  is the universal gas constant and  $T$  is the absolute temperature, that we set to  $37^\circ C$  in order to model the normothermia. All the values for the constants in Eq. (2) and (3) were chosen as in [9].

In order to validate the extended HepatoNet1 metabolic network model (i.e. including glyoxylate related reactions), we first performed flux-balance analyses, as described above, to establish a flux distribution for each of the different metabolic objectives listed in **Table S2**. We then applied a *producibility analysis* to test that the model was indeed able to produce all the compounds in glyoxylate metabolism. We define a metabolite  $x_i$  as *producibile* if the network can sustain its synthesis under the steady state and thermodynamic constraints. To test the producibility of  $x_i$ , we added a reaction  $r_j$  in the cytoplasmic compartment which consumes  $x_i$ , and then solved the flux-balance problem to check if the network was able to produce a strictly positive flux through  $r_j$ .

### 3.2 Simulation of the loss- or gain-of-function of an enzyme with the metabolic network model

In order to simulate the effect of a loss-of-function (LoF) of an enzyme  $e_j$  catalyzing the reaction  $r_j$ , we first solved  $l = 442$  optimization problems of type (2) to compute the wild-type flux distributions across 442 different metabolic conditions (a list of the metabolic objectives is reported in **Table S2**) forcing the fluxes through enzyme  $e_j$  to be greater than a threshold. Secondly, we computed the LoF flux distributions by solving the same 442 flux-balance problems but this time constraining the fluxes through enzyme  $e_j$  to zero, that is,  $v_j^{(+)} = v_j^{(-)} = 0$ . The results of the simulations were stored in two matrices that contain the values of the fluxes for each of the  $m$  internal reactions computed either in the wild-type simulations ( $\mathbb{V}^{wt} \in \mathbb{R}^{m \times l}$ ) or in the loss of function simulations ( $\mathbb{V}^{ko} \in \mathbb{R}^{m \times l}$ ). Namely,  $v_{i,j}^{wt} \in \mathbb{V}^{wt}$  ( $v_{i,j}^{ko} \in \mathbb{V}^{ko}$ ) represents the flux of reaction  $r_i$  in the  $j$ -th metabolic functions, with  $v_{i,j} = v_i^{(+)}$  if  $v_i^{(+)} > 0$  and  $v_{i,j} = -v_i^{(-)}$  if  $v_i^{(-)} > 0$ . We followed this rule to store the value of a metabolic flux  $v_i$  and to take the direction of  $r_i$  into account.

In order to simulate the effect of a gain-of-function (GoF) of an enzyme  $e_j$  catalyzing the reaction  $r_j$  we adopted the following rule: if  $\Delta G_{r_j}^0 \leq 0$  then  $u_j^{GoF(+)} = u_j^{(+)} + k$  and  $l_j^{GoF(+)} = k$ , otherwise  $u_j^{GoF(-)} = u_j^{(-)} + k$ ,  $l_j^{GoF(-)} = k$ , with  $k = 1000$ . Effectively these constrains force the flux through enzyme  $e_j$  in the GoF simulation to be increased of  $k$  compared to the wild-type model. As for the LoF, the



results of the simulations were stored in a matrix  $\mathbb{V}^{GoF}$ .

### 3.3 Differential Flux-balance Analysis (DFA)

We first applied a computational approach we previously described in [13]. Specifically, for each reaction  $r_i$  we computed the difference ( $\delta_{i,j}$ ) between the flux in the wild-type model and the flux in the LoF (or GoF) model for the  $j$ -th metabolic objectives (**Table S2**):

$$\Delta = \mathbb{V}^{wt} - \mathbb{V}^{ko} \in \mathbb{R}^{m \times l} \quad (5)$$

where  $\delta_{i,j}$  is the element of  $\Delta$  having indexes  $i$  and  $j$ . Next, we computed for each reaction  $r_i$  the average flux difference across the  $l$  metabolic objectives :

$$\delta_i = \frac{1}{l} \sum_{j=1}^l \delta_{i,j} \quad (6)$$

for  $i = 1, 2, \dots, m$ . These values are used to rank each reaction, arranged in descending order. In this way, reactions at the top of the list are those predicted to have a reduced metabolic flux because of the enzyme loss-of-function (or gain-of-function), vice-versa those at the bottom of the list, will be the reactions whose flux is predicted to increase as consequence of the enzyme loss-of-function (or gain-of-function).

In order to rank metabolites, we also took into account the stoichiometry of the metabolic network to estimate the impact of the enzyme LoF (or GoF) on a metabolite concentration  $x_i$  by means of the following index:

$$\psi_{x_i} = \sum_{j=1}^m \hat{s}_{i,j} |\delta_i| \quad (7)$$

where  $\hat{s}_{i,j}$  is the element of matrix  $\hat{\mathbb{S}}$ , the binary form of  $\tilde{\mathbb{S}}$  [14], of index  $(i, j)$ . The  $\psi_{x_1}, \psi_{x_2}, \dots, \psi_{x_n}$  values are used to obtain a ranked list of metabolites ( $X^{ord}$ , **Table 1 and Table S3**). This list reports, at the top, the metabolites most affected by a loss-of-function (or gain-of-function). Small molecules (e.g., water, carbon dioxide), cofactors (e.g., NADP, ATP), and a set of compounds were removed, because they are involved in a large number of reactions (**Table S2**).

### 3.4 Flux Variability Analysis (FVA)

DFA estimates how much the fluxes involving a specific metabolite change in response to a LoF (or GoF) of a specific enzyme. We thus take this quantity (i.e. the value computed as in Eq. (eq:metrank)) as a proxy for the potential change in metabolite concentration as result of the enzyme LoF (or GoF). However DFA cannot predict the sign of the change (i.e. whether the metabolite is elevated or reduced). This happens because FBA assumes that no metabolites' accumulation or depletion can occur.

In order to overcome this limitation, we applied Flux Variability Analysis (FVA) as described in [11, 15, 16]. The idea is to compute an exchange interval  $I$  for each

metabolite  $x$  both in the WT model and in the LoF (or GoF) model. This interval denotes the minimal ( $v_{min}$ ) and maximal ( $v_{max}$ ) output flux of a metabolite  $x$  which can be supported by the metabolic model. For each metabolite, we compared the exchange interval computed for the WT model to the one computed for the LoF (GoF) model. If the two intervals coincide, then no sign can be assigned to the metabolite. Otherwise it is said to increase or decrease depending on the values of the two intervals.

In order to compute the exchange interval  $I_{cond} = [v_{min}, v_{max}]$  for a metabolite  $x$  in condition  $cond \in \{WT, LOF\}$  we proceeded as follows: we first introduced, if not yet in the model, a consuming reaction  $r$  in the cytoplasm associated to a flux  $v$  consuming the metabolite  $x$ ; an exchange interval  $I_{cond}^k = [v_{min}^k, v_{max}^k]$  for  $x$  in each of the  $k = 1 \dots 442$  metabolic objectives is then computed by determining the minimal and maximal values of  $v^k$  by solving the following two linear programming optimization problems, subject to the constraints in Eqs. (3), for the appropriate model (e.g. WT or LOF):

$$\min_{V \in \mathbb{R}^{2m}} \left( \frac{1}{2} \left( \sum_{j=1}^m (w_j \times v_j^{(+)} + w_j \times K_j^{equ} \times v_j^{(-)}) \right) + \frac{1}{2} v_{min}^k \right) \quad (8)$$

in order to obtain  $v_{min}^k$  and

$$\min_{V \in \mathbb{R}^{2m}} \left( \frac{1}{2} \left( \sum_{j=1}^m (w_j \times v_j^{(+)} + w_j \times K_j^{equ} \times v_j^{(-)}) \right) - \frac{1}{2} v_{max}^k \right) \quad (9)$$

in order to obtain  $v_{max}^k$ .

The exchange interval of the metabolite  $x$  is then defined as

$$I_{cond} = \left[ \max_{k \in [1, 442]} (v_{min}^k), \max_{k \in [1, 442]} (v_{max}^k) \right].$$

The results of DFA and FVA to the PH1 model are reported in the main manuscript (**Table 1**) and in the **Supplemental information (Table S3)**.

### 3.5 *In silico* analysis of AGT Loss of Function

We applied DFA to the extended Hepatonet1 model in order to rank all of the metabolites ( $\approx 800$ ) and reactions in the model ( $\approx 2600$ ) according to their average magnitude of change in the AGT LoF versus wild-type model across the 442 physiological objectives. The reactions are reported in **Table S3**, ranked according to the absolute change, and metabolites are reported in **Table S3** and **Table 1** of the main manuscript.

As summarised in **Figure 2**, **Figure S1A**, and **Table S3**, the GPT reaction increases its flux because of an excess of alanine, which is no longer consumed by the AGT reaction in the peroxisome and it is thus redirected to GPT in the cytoplasm. The increase in flux through GPT, which produces pyruvate and glutamate, is thus counterbalanced by a **decrease** in the histidine degradation flux towards glutamate (**Figure S1A**). To

achieve this reduction, the model forces the flux from histidine to histamine to increase (**Figure S1A**). This scenario however is not physiological for several reasons: (1) the physiological concentrations of histamine (nanomolar range) and histidine (micromolar range) are very different; (2) amino-acid degradation in the liver mainly occurs to produce energy in the form of glucose and not to produce histamine.

Therefore, we performed additional simulations for each of the 442 metabolic objectives listed in **Table S2**, this time forcing the flux of histidine to histamine to be zero (**Table S5**). As before, the PH1 model predicts an increased flux through GPT caused by an excess of alanine because of AGT loss of function. However, this time the histidine degradation flux to glutamate cannot be reduced (since histidine has nowhere else to go). Therefore, as depicted in (**Figure S1B**) and reported in **Table S5**, the model finds another solution to balance glutamate excess, i.e. it increases the flux from histidine to glutamate, and at the same time, increases glutamate metabolism and the urea cycle, so that glutamate levels are kept in check. In this case, the reduction of histidine/histamine levels is explained by the *in silico* model by an increased degradation of histidine in hepatocytes.

We believe the latter solution to be the most physiological plausible, and in agreement with our experimental observation of reduced histidine levels systemically in PH1 mice and patients, and of reduced histamine levels in wild-type mice following acute alanine administration.

Regardless of which solution is the most physiologically relevant, both solutions suggests a central role of alanine and the GPT enzyme in mediating the effects of the AGT LoF on histidine metabolism.

## References

- [1] J. R. Asplin. Hyperoxaluric calcium nephrolithiasis. *Endocrinol Metab Clin North Am*, 31(4):927–49, 2002.
- [2] P. R. S. Baker, S. D. Cramer, M. Kennedy, D. G. Assimos, and R. P. Holmes. Glycolate and glyoxylate metabolism in hepg2 cells. *American Journal of Physiology - Cell Physiology*, 287(5):C1359–C1365, 2004.
- [3] B. Vogelstein Editor K. W. Kinzle Editor S. E. Antonarakis Editor A. Ballabio Editor K. M. Gibson Editor G. Mitchel Editor D. Valle Editor-in Chief, A. L. Beaudet Editor. *The Online Metabolic and Molecular Bases of Inherited Disease, Chapter 133*. Mc Graw Hill, International Edition.
- [4] C. J. Danpure. Primary hyperoxaluria type 1: Agt mistargeting highlights the fundamental differences between the peroxisomal and mitochondrial protein import pathways. *Biochimica et Biophysica Acta (BBA) - Molecular Cell Research*, 1763(12):1776 – 1784, 2006.
- [5] C. J. Danpure and G. Rumsby. Molecular aetiology of primary hyperoxaluria and its implications for clinical management. *Expert Reviews in Molecular Medicine*, 6:1–16, 2004.
- [6] C.J. Danpure and P.R Jennings. Peroxisomal alanine:glyoxylate aminotransferase deficiency in primary hyperoxaluria type i. *FEBS Letters*, 201(1):20 – 34, 1986.
- [7] S. Donini, M. Ferrari, C. Fedeli, M. Faini, I. Lamberto, A. Serena Marletta, L. Mellini, M. Panini, R. Percudani, L. Pollegioni, L. Caldinelli, S. Petrucco, and A. Peracchi. Recombinant production of eight human cytosolic aminotransferases and assessment of their potential involvement in glyoxylate metabolism. *Biochemical Journal*, 422(2):265–272, 2009.
- [8] N. C. Duarte, S. A. Becker, N. Jamshidi, I. Thiele, M. L. Mo, T. D. Vo, R. Srivas, and B. Palsson. Global reconstruction of the human metabolic network based on genomic and bibliomic data. *Proceedings of the National Academy of Sciences*, 104(6):1777–1782, February 2007.
- [9] C. Gille, C. Bolling, A. Hoppe, S. Bulik, S. Hoffmann, K. Hubner, A. Karlstadt, R. Ganeshan, M. Konig, K. Rother, M. Weidlich, J. Behre, and H. Holzhtutter. HepatoNet1: a comprehensive metabolic reconstruction of the human hepatocyte for the analysis of liver physiology. *Molecular Systems Biology*, 6(1), September 2010.
- [10] H. G. Holzhtutter. The principle of flux minimization and its application to estimate stationary fluxes in metabolic networks. *European Journal of Biochemistry*, 271(14):2905–2922, 2004.
- [11] L. Jerby, T. Shlomi, and E. Ruppin. Computational reconstruction of tissue-specific metabolic models: application to human liver metabolism. *Molecular Systems Biology*, 6(1), 2010.



- [12] C. G. Monico, M. Persson, G. C. Ford, G. Rumsby, and D. S. Milliner. Potential mechanisms of marked hyperoxaluria not due to primary hyperoxaluria I or II. *Kidney International*, 62:392–400, 2002.
- [13] R. Pagliarini and D. di Bernardo. A genome-scale modeling approach to study inborn errors of liver metabolism: Toward an in silico patient. *Journal of Computational Biology*, 20(5):383–397, 2013.
- [14] B. O. Palsson. *Systems Biology: Properties of Reconstructed Networks*. Cambridge University Press, 1 edition, January 2006.
- [15] T. Shlomi, M. N. Cabili, and E. Ruppin. Predicting metabolic biomarkers of human inborn errors of metabolism. *Molecular Systems Biology*, 5, April 2009.
- [16] I. Thiele, N. Swainston, R. M. T. Fleming, A. Hoppe, S. Sahoo, M. K. Aurich, H. Haraldsdottir, M. L. Mo, O. R. Rolfsson, M. D. Stobbe, S. G. Thorleifsson, R. Agren, C. Bolling, S. Bordel, A. K. Chavali, P. Dobson, W. B. Dunn, L. Endler, D. Hala, M. Hucka, D. Hull, D. Jameson, N. Jamshidi, J. J. Jonsson, N. Juty, S. Keating, I. Nookaew, N. Le Novere, N. Malys, A. Mazein, J. A. Papin, N. D. Price, E. Selkov, M. I. Sigurdsson, E. Simeonidis, N. Sonnenschein, K. Smallbone, A. Sorokin, J. H. G. M. van Beek, D. Weichart, I. Goryanin, J. Nielsen, H. V. Westerhoff, D. B. Kell, P. Mendes, and B. O. Palsson. A community-driven global reconstruction of human metabolism. *Nature Biotechnology*, 31(5):419–425, March 2013.
